# Supplementary material for: Limited role of regulatory T cells during acute Theiler virus-induced encephalitis in resistant C57BL/6 mice
Source: PubMed Central journal article supplement (PMC4236492; doi:10.1186/s12974-014-0180-9), 2014-11-13
Supplement: 12974_2014_180_MOESM1_ESM.pdf [file 12974_2014_180_MOESM1_ESM.pdf]

**Supplementary table 1:** Taqman probes used for RT-PCR analysis

| <b>Gene</b>   | <b>Assay</b>  |
|---------------|---------------|
| CCL2          | Mm00441242_m1 |
| CxCL10        | Mm00445235_m1 |
| IL-10         | Mm00439616_m1 |
| IL-6          | Mm00446190_m1 |
| CSF2          | Mm00438328_m1 |
| TNF- $\alpha$ | Mm00443258_m1 |
| IFN- $\gamma$ | Mm01168134_m1 |
| NOS-2         | Mm00440485_m1 |
| HPRT          | Mm00446968_m1 |
| GAPDH         | Mm99999915_g1 |
